# Supplementary material for: XTEND: Two-Year Results from a Global Observational Study Investigating Proactive Dosing of Intravitreal Aflibercept in Neovascular Age-Related Macular Degeneration
Source: Springer Nature journal article supplement (doi:10.1007/s40123-023-00867-x), 2024-01-10
Supplement: MOESM1 [file 26614498]

## SUPPLEMENTARY MATERIALS

### **XTEND: Two-Year Results from a Global Observational Study Investigating Proactive Dosing of Intravitreal Aflibercept in Neovascular Age-Related Macular Degeneration**

#### **Authors**

Jean-François Korobelnik,<sup>1,2</sup> Varun Chaudhary,<sup>3</sup> Paul Mitchell,<sup>4</sup> Se Woong Kang,<sup>5</sup> Ramin Tadayoni,<sup>6</sup> Helmut Allmeier,<sup>7</sup> JinKyung Lee,<sup>8</sup> Xin Zhang,<sup>7</sup> Tobias Machewitz,<sup>8</sup> Clare Bailey<sup>9</sup>

<sup>1</sup>CHU Bordeaux, Service d'Ophtalmologie, Bordeaux, France

<sup>2</sup>University of Bordeaux, INSERM, BPH, UMR1219, F-33000 Bordeaux, France

<sup>3</sup>Hamilton Regional Eye Institute, St. Joseph's Healthcare Hamilton, McMaster University, Hamilton, Ontario, Canada

<sup>4</sup>University of Sydney (Westmead Institute for Medical Research), Sydney, New South Wales, Australia

<sup>5</sup>Samsung Medical Center, Sungkyunkwan University, Seoul, Republic of Korea

<sup>6</sup>Hôpital Lariboisière, AP-HP, Université Paris 7 – Sorbonne Paris Cité, Paris Hôpital, Paris, France

<sup>7</sup>Bayer Consumer Care AG, Basel, Switzerland

<sup>8</sup>Bayer AG, Berlin, Germany

<sup>9</sup>Bristol Eye Hospital, Bristol, United Kingdom

#### **Corresponding author**

Prof. Jean-François Korobelnik

CHU de Bordeaux, Service d'Ophtalmologie, University of Bordeaux, INSERM

Place Amélie Raba Léon, 33000 Bordeaux, France

Phone: +33 05 56 79 55 30

Email: jean-francois.korobelnik@chu-bordeaux.fr

**Online Supplementary Table S1 Ethics approval boards**

| Country   | Site # | Site name                            | Name of the ethics committees                                          | Number/ID of the approvals             |
|-----------|--------|--------------------------------------|------------------------------------------------------------------------|----------------------------------------|
| Argentina | 43001  | Centro Oftalmológico                 | Comité de Etica en Investigación Clínica                               | 6/13/2019<br>13Mar20                   |
| Argentina | 43002  | Salud Ocular                         | Comité de Etica en Investigación Clínica                               | 6/13/2019<br>13Mar20                   |
| Argentina | 43003  | Centro Oftalmológico                 | Comité de Etica en Investigación Clínica                               | 6/13/2019<br>13Mar20                   |
| Argentina | 43004  | Centro de Estudios Oftalmológico     | Comité de Etica en Investigación Clínica                               | 6/13/2019<br>13Mar20                   |
| Argentina | 43005  | Clinica Privada de Oftalmológico     | Comité de Etica en Investigación-Instituto de Investigaciones Clínicas | 10/4/2019<br>09Oct20                   |
| Australia | 40001  | Sydney Retina Clinic                 | Bellberry Human Research Ethics Committee                              | EC00444                                |
| Australia | 40002  | Southwest Retina                     |                                                                        |                                        |
| Australia | 40003  | Sydney West Retina                   |                                                                        |                                        |
| Australia | 40004  | Specialist Eye Group                 |                                                                        |                                        |
| Australia | 40005  | Adelaide Eye and Retina              |                                                                        |                                        |
| Belgium   | 28001  | UZ (Universitair Ziekenhuis Leuven)  | Ethische Commissie Onderzoek UZ/KU Leuven                              | EC: S62610, Belg. Regnr: B322201940359 |
| Belgium   | 28002  | UZ Brussel - Ophthalmology           |                                                                        |                                        |
| Belgium   | 28003  | ZNA-Ziekenhuizen                     |                                                                        |                                        |
| Belgium   | 28004  | AZ Sint-Jan Brugge-Oostende          |                                                                        |                                        |
| Belgium   | 28005  | Cliniques Universitaires Saint-Luc   |                                                                        |                                        |
| Belgium   | 28006  | UZ (Universitair Ziekenhuis Brussel) |                                                                        |                                        |
| Belgium   | 28007  | Private practice Alk                 |                                                                        |                                        |
| Belgium   | 28008  | CHR Peltzer-La Tourelle              |                                                                        |                                        |
| Belgium   | 28009  | Oculus Leper                         |                                                                        |                                        |
| Belgium   | 28010  | CHR de la Citadelle                  |                                                                        |                                        |
| Canada    | 26001  | OculoVision                          | Advarra, Inc.                                                          | Pro00033372<br>27MAY2019               |
| Canada    | 26007  | Arif Samad                           | Advarra, Inc.                                                          | Pro00033372<br>11SEPT2019              |
| Canada    | 26008  | Clinique de Rétine de l'Est          | Advarra, Inc.                                                          | Pro00033372<br>3SEPT2019               |
| Canada    | 26009  | Institut de l'oeil                   | Advarra, Inc.                                                          | Pro00033372<br>19AUG2019               |
| Canada    | 26010  | RETINA MD                            | Advarra, Inc.                                                          | Pro00033372<br>29OCT2019               |
| Canada    | 26011  | North Toronto Eye Care               | Advarra, Inc.                                                          | Pro00033372<br>23SEPT2019              |
| Canada    | 26012  | Ivey Eye Institute                   | Western University Health Science Research Ethics Board (HSREB)        | 114566<br>7OCT2019                     |
| Canada    | 26013  | Hamilton Regional Eye                | Hamilton Integrated Research Ethics Board                              | 7484<br>9/10/2019                      |
| Canada    | 26014  | Kensington Eye Clinic                | Advarra, Inc.                                                          | Pro00033372<br>11/25/2019              |

|          |       |                                                                 |                                                                                                                |                                    |
|----------|-------|-----------------------------------------------------------------|----------------------------------------------------------------------------------------------------------------|------------------------------------|
| Canada   | 26015 | Prism Eye Institute                                             | Advarra, Inc.                                                                                                  | Pro00033372<br>11/26/2019          |
| China    | 54001 | Beijing Hospital                                                | Institutional Review Board of<br>Beijing Hospital                                                              | 2019BJYYEC-092-<br>02              |
| China    | 54002 | The First Affiliated Hospital<br>of Zhengzhou University        | Research and Clinical Trial<br>Ethics Committee of the First<br>Affiliated Hospital of<br>Zhengzhou University | SS-2019-062                        |
| China    | 54003 | Xi' an No.4 Hospital                                            | IRB of Institution for National<br>Drug Clinical Trials, Xi'an<br>People's Hospital (Xi'an<br>Fourth Hospital) | Put Record No.001                  |
| China    | 54004 | Xuzhou No.1 People's<br>Hospital                                | Xuzhou No.1 People's<br>Hospital Medical Ethics<br>Committee                                                   | No. xyyl[2019]25                   |
| China    | 54005 | The Affiliated Eye Hospital<br>of Nanjing Medical<br>University | IRB of The Affiliated Eye<br>Hospital of Nanjing Medical<br>University                                         | [2019] Lun Shen Zi<br>No.(2019009) |
| China    | 54006 | Shenzhen Ophthalmic<br>Hospital                                 | Medical Ethics Committee of<br>Shenzhen Eyes Hospital                                                          | No. 20191021-01                    |
| China    | 54007 | Peking Union Medical<br>College Hospital                        | Ethics Review Committee of<br>Peking Union Medical<br>College Hospital                                         | B336                               |
| Colombia | 48001 | Fundación de oftalmólogos<br>en Bogotá                          | Cómite de Ética en<br>Investigación de la<br>Fundación Oftalmológica<br>Nacional                               | 15-Aug-19                          |
| Colombia | 48002 | Fundación Oftalmológica<br>del Caribe                           | Cómite de Ética en<br>Investigación Clínica<br>Oftalmológica del Caribe                                        | 24-Sep-19                          |
| Colombia | 48003 | DRA. Beatriz Elvira Endo<br>Abella                              | Cómite de Ética en<br>Investigación Fundación<br>BIOS                                                          | 05-Sep-19                          |
| Colombia | 48005 | INICIO                                                          | Cómite de Ética en<br>Investigación Instituto<br>Neurológico de Colombia                                       | 25-Sep-19                          |
| Colombia | 48006 | Clínica FOSCAL                                                  | Cómite de Ética en<br>Investigación FOSCAL                                                                     | 13-Sep-19                          |
| Colombia | 48008 | DRA. Myriam Hernández                                           | Cómite de Ética en<br>Investigación Fundación<br>BIOS                                                          | 05-Sep-19                          |
| Denmark  | 35001 | Hospital of Southern<br>Denmark                                 | no need to submit                                                                                              | NA                                 |
| Denmark  | 35002 | Aalborg University Hospital                                     | no need to submit                                                                                              | NA                                 |
| France   | 16001 | CHU Bordeaux                                                    | C.P.P. I.D.F VII (Comité de<br>Protection des Personnes Ile-<br>de-France VII)                                 | 19-050                             |
| France   | 16002 | CIL (Centre<br>Ophtalmologique)                                 |                                                                                                                |                                    |
| France   | 16003 | Cabinet Ophtalmologique                                         |                                                                                                                |                                    |
| France   | 16004 | Cabinet Ophtalmologique                                         |                                                                                                                |                                    |
| France   | 16005 | Centre Odéon Paris                                              |                                                                                                                |                                    |
| France   | 16006 | CHU de Dijon                                                    |                                                                                                                |                                    |
| France   | 16007 | Hôpital d'instruction des<br>armées                             |                                                                                                                |                                    |
| France   | 16008 | Cabinet d'Ophtalmologique                                       |                                                                                                                |                                    |

|         |       |                                                   |                                                                                                                                                                   |                                                       |
|---------|-------|---------------------------------------------------|-------------------------------------------------------------------------------------------------------------------------------------------------------------------|-------------------------------------------------------|
| France  | 16009 | Hôpital de la Croix-Rousse                        |                                                                                                                                                                   |                                                       |
| France  | 16010 | Pôle Vision Val d'Ouest                           |                                                                                                                                                                   |                                                       |
| France  | 16011 | CHU Gabriel-Montpied<br>Clermont-Ferrand          |                                                                                                                                                                   |                                                       |
| France  | 16012 | Clinique Honoré Cave                              |                                                                                                                                                                   |                                                       |
| France  | 16013 | Centre de Rétine Médicale                         |                                                                                                                                                                   |                                                       |
| France  | 16014 | Centre Ophtalmologie<br>Rétine Gallien à Bordeaux |                                                                                                                                                                   |                                                       |
| France  | 16015 | Centre Ophtalmologique                            |                                                                                                                                                                   |                                                       |
| France  | 16016 | CHU de Nice                                       |                                                                                                                                                                   |                                                       |
| France  | 16017 | CHU de Marseille                                  |                                                                                                                                                                   |                                                       |
| France  | 16018 | Hôpital Lariboisière                              |                                                                                                                                                                   |                                                       |
| France  | 16019 | Cabinet Ophtalmologique                           |                                                                                                                                                                   |                                                       |
| France  | 16020 | Cabinet Ophtalmologique                           |                                                                                                                                                                   |                                                       |
| France  | 16021 | Fondation Ophtalmologique                         |                                                                                                                                                                   |                                                       |
| France  | 16022 | Cabinet Ophtalmologique                           |                                                                                                                                                                   |                                                       |
| France  | 16023 | Centre Explore Vision                             |                                                                                                                                                                   |                                                       |
| France  | 16024 | Cabinet Ophtalmologique                           |                                                                                                                                                                   |                                                       |
| France  | 16025 | CHIC Intercommunal de<br>Creteil                  |                                                                                                                                                                   |                                                       |
| France  | 16026 | Hôpital Purpan, CHU de<br>Toulouse                |                                                                                                                                                                   |                                                       |
| France  | 16027 | Hôpital des Quinze-Vingts                         |                                                                                                                                                                   |                                                       |
| France  | 16028 | La Pitié Salpêtrière                              |                                                                                                                                                                   |                                                       |
| France  | 16029 | Cabinet Ophtalmologique                           |                                                                                                                                                                   |                                                       |
| France  | 16030 | Hôpital Cochin                                    |                                                                                                                                                                   |                                                       |
| France  | 16031 | Clinique Mathilde Rouen                           |                                                                                                                                                                   |                                                       |
| Ireland | 80001 | Progressive Vision                                | Research Ethics committee<br>administrator, Beacon<br>hospital, Suite 13, Sandyford,<br>Dublin 18, Ireland                                                        | BEA0128                                               |
| Ireland | 80002 | UPMC Whitfield Hospital                           | Clinical Research Ethics<br>Committee of the Cork<br>Teaching Hospitals,<br>University College Cork,<br>Lancaster Hall, 6 Little<br>Hanover Street, Cork, Ireland | ECM 4 (s)<br>22/10/2019<br>& ECM 3 (pp)<br>05/05/2020 |

|                    |       |                                                                             |                                                                                                              |                                                            |
|--------------------|-------|-----------------------------------------------------------------------------|--------------------------------------------------------------------------------------------------------------|------------------------------------------------------------|
| Ireland            | 80003 | The Mater Hospital                                                          | Institutional review board,<br>Mater Misericordiae<br>University Hospital, Eccles<br>Street, Dublin, Ireland | 1/378/2087                                                 |
| Italy              | 22001 | IRCCS Fondazione G. Bietti per lo Studio e la Ricerca in Oftalmologia ONLUS | COMITATO ETICO CENTRALE I.R.C.C.S. LAZIO<br>Sezione IRCCS I.F.O. – Fondazione G.B. Bietti                    | Registro Sperimentazioni 87/19/FB/verbale 7 del 16/07/2019 |
| Italy              | 22002 | Presidio Ospedaliero San Giovanni di Dio, Cagliari                          | COMITATO ETICO INDIPENDENTE Azienda Ospedaliero Universitaria di Cagliari                                    |                                                            |
| Italy              | 22003 | Ospedale Santa Maria della Misericordia                                     | Comitato Etico Unico Regionale FVG                                                                           | ID Studio 2920/Parere CEUR-2019-Os-160                     |
| Korea, Republic Of | 56001 | Yeungnam University Hospital                                                | Yeungnam University IRB                                                                                      | YUMC 2019-03-047                                           |
| Korea, Republic Of | 56002 | Seoul National University Hospital                                          | Clinical Research Information Service Seoul National University Hospital                                     | H-1906-095-1040                                            |
| Korea, Republic Of | 56003 | Ajou University Hospital                                                    | Ajou University Hospital IRB                                                                                 | AJIRB-MED-OBS-19-197                                       |
| Korea, Republic Of | 56004 | Samsung Medical Center                                                      | Samsung Medical Center IRB                                                                                   | SMC-2019-07-079                                            |
| Korea, Republic Of | 56005 | Pusan National University Hospital                                          | Pusan National University IRB                                                                                | H-1903-004-090                                             |
| Korea, Republic Of | 56006 | GangNam Severance Hospital                                                  | Yonsei University GangNam Severance Hospital IRB                                                             | 3-2019-0054                                                |
| Korea, Republic Of | 56007 | The Catholic University Hospital                                            | The Catholic University Hospital IRB                                                                         | KC19MOGE0416                                               |
| Korea, Republic Of | 56008 | Hanyang University Guri University Hospital                                 | Hanyang University Guri Hospital IRB                                                                         | GURI 2019-06-021                                           |
| Korea, Republic Of | 56009 | Kim's Eye Hospital                                                          | Kim's Eye Hospital IRB                                                                                       | KEH 2019-06-005-007                                        |
| Korea, Republic Of | 56010 | ChungNam National University Hospital                                       | ChungNam National University IRB                                                                             | CNUH-2019-06-060                                           |
| Norway             | 36001 | Hospital of Southern Norway                                                 | REC South-East, Gullhaugveien 1-3, 0484 Oslo, Norway                                                         | 2019/894                                                   |
| Norway             | 36001 | Sørlandet Sykehus, Arendal                                                  | REC South-East, Gullhaugveien 1-3, 0484 Oslo, Norway                                                         | 2019/894                                                   |
| Spain              | 24002 | Hospital Universitare                                                       | Comité de Ética de la Investigación de Cádiz                                                                 |                                                            |
| Spain              | 24004 | Hospital Universitario Virgen de la Arrixaca                                |                                                                                                              |                                                            |
| Spain              | 24007 | Hospital Virgen del Rocio                                                   |                                                                                                              |                                                            |

|                |       |                                      |                                                                                                               |                                     |
|----------------|-------|--------------------------------------|---------------------------------------------------------------------------------------------------------------|-------------------------------------|
| Spain          | 24009 | Hospital ESPERANÇA                   | Comité de Ética de la Investigación con medicamentos del Parc de Salut MAR                                    |                                     |
| Spain          | 24010 | Hospital Universitario Araba         | Comité de Ética en Investigación Clínica (CEIC) de Euskadi                                                    |                                     |
| Spain          | 24011 | Hospital de Cruces                   | Comité de Ética en Investigación Clínica (CEIC) de Euskadi                                                    |                                     |
| Spain          | 24012 | Hospital Arnau de Vilanova           | Comité ético de investigación del Hospital Universitario Arnau de Vilanova                                    |                                     |
| Spain          | 24013 | Hospital Regional Universitario      |                                                                                                               |                                     |
| Spain          | 24014 | Hospital de Leon                     | Comité de Ética de la Investigación con medicamentos de las Áreas de Salud de León y del Bierzo               |                                     |
| Spain          | 24015 | Hospital de Burgos                   |                                                                                                               |                                     |
| Sweden         | 34001 | Skaane University Hospital           | Swedish Ethical Review Authority, Box 2110, 75002 Uppsala, Sweden                                             | 2019-02642                          |
| Sweden         | 34002 | Uppsala University                   |                                                                                                               |                                     |
| Sweden         | 34003 | OegonCentrum Annedal                 |                                                                                                               |                                     |
| Sweden         | 34004 | Helsingborg Hospital                 |                                                                                                               |                                     |
| Sweden         | 34001 | Skånes University Hospital Lund      | Swedish Ethical Review Authority, Box 2110, 75002 Uppsala, Sweden                                             | 2019-02642                          |
| Switzerland    | 58001 | Vista Klinik Binningen               | Ethikkommission Nordwest- und Zentralschweiz (EKNZ)                                                           | 2019-01573                          |
| Switzerland    | 58002 | Universitätsspital Basel             |                                                                                                               |                                     |
| Switzerland    | 58003 | Stadsspital Triemli                  |                                                                                                               |                                     |
| Switzerland    | 58004 | RétinElysée                          |                                                                                                               |                                     |
| Switzerland    | 58005 | Universitätsspital Zurich            |                                                                                                               |                                     |
| Switzerland    | 58006 | Luzerner Kantonsspital               |                                                                                                               |                                     |
| Thailand       | 71001 | King Chulalongkorn Memorial Hospital | Institutional Review Board Faculty of Medicine, Chulalongkorn University                                      | COA no.1016/2019 and IRB no. 479/62 |
| Thailand       | 71002 | Chiang Mai University                | Research Ethics Committee Faculty of Medicine Chiang Mai University                                           | 004/2563                            |
| Thailand       | 71003 | Khon Kaen University                 | Khon Kaen University Ethics Committee in Human Research Faculty of Medicine, Khon Kaen University             | HE621430                            |
| United Kingdom | 12001 | Bristol Eye Hospital                 | South Central - Oxford C Research Ethics Committee and HRA and Health and Care Research Wales (HCRW) Approval | 19/SC/0148                          |
| United Kingdom | 12002 | Queen Alexandra Hospital             |                                                                                                               |                                     |
| United Kingdom | 12003 | Leicester Royal Infirmary            |                                                                                                               |                                     |
| United Kingdom | 12004 | King's College Hospital              |                                                                                                               |                                     |
| United Kingdom | 12005 | Colchester Eye Centre                |                                                                                                               |                                     |

|                |       |                                         |  |  |
|----------------|-------|-----------------------------------------|--|--|
| United Kingdom | 12006 | Singleton Hospital                      |  |  |
| United Kingdom | 12007 | Stoke Mandeville Hospital               |  |  |
| United Kingdom | 12008 | Westmorland General Hospital            |  |  |
| United Kingdom | 12009 | Royal Victoria Infirmary                |  |  |
| United Kingdom | 12010 | Gloucestershire Royal Hospital          |  |  |
| United Kingdom | 12011 | Aberdeen Royal Infirmary                |  |  |
| United Kingdom | 12012 | Royal Liverpool University              |  |  |
| United Kingdom | 12013 | Norfolk and Norwich University Hospital |  |  |
| United Kingdom | 12014 | Royal Victoria Hospital                 |  |  |
| United Kingdom | 12015 | The York Hospital                       |  |  |
| United Kingdom | 12016 | Sunderland Eye Hospital                 |  |  |
| United Kingdom | 12017 | Birmingham & Midland Eye Centre         |  |  |
| United Kingdom | 12018 | Frimley Park Hospital                   |  |  |
| United Kingdom | 12019 | New Cross Hospital                      |  |  |
| United Kingdom | 12020 | Moorfields Eye Hospital                 |  |  |
| United Kingdom | 12021 | East Kent Hospitals                     |  |  |
| United Kingdom | 12022 | Peterborough City Hospital              |  |  |
| United Kingdom | 12023 | Epsom and St Helier Hospital            |  |  |
| United Kingdom | 12024 | Southampton Hospitals                   |  |  |

**Online Supplementary Table S2** Inclusion and exclusion criteria

| Inclusion criteria                                                                                                                                                                                                                                                                                                                                                                                                                                                                             | Exclusion criteria                                                                                                                                                                                                                                                                                                                                                                                                                                                                                                                                                                                                                                                                                                                                                                                                                                |
|------------------------------------------------------------------------------------------------------------------------------------------------------------------------------------------------------------------------------------------------------------------------------------------------------------------------------------------------------------------------------------------------------------------------------------------------------------------------------------------------|---------------------------------------------------------------------------------------------------------------------------------------------------------------------------------------------------------------------------------------------------------------------------------------------------------------------------------------------------------------------------------------------------------------------------------------------------------------------------------------------------------------------------------------------------------------------------------------------------------------------------------------------------------------------------------------------------------------------------------------------------------------------------------------------------------------------------------------------------|
| <ul style="list-style-type: none"> <li>○ A diagnosis of nAMD</li> <li>○ Patients for whom the decision to initiate treatment with IVT-AFL in a proactive regimen was made as routine clinical practice</li> <li>○ Treatment naïve in the study eye (no prior therapy for nAMD)</li> <li>○ Patient aged <math>\geq 50</math> years</li> <li>○ Written informed patient consent before the start of data collection (according to the requirements of the local authorities and laws)</li> </ul> | <ul style="list-style-type: none"> <li>○ Participation in an investigational program with interventions outside of routine clinical practice</li> <li>○ Patients with contraindications to IVT-AFL listed in the local marketing authorization</li> <li>○ Planned treatment regimen outside of the local marketing authorization</li> <li>○ Patients with eye diseases, e.g. advanced glaucoma or visually significant cataracts, likely to require surgery during the observation period in the study eye</li> <li>○ Concomitant ocular or systemic administration of drugs up to 3 months before IVT-AFL treatment that could interfere with or potentiate the mechanism of action of IVT-AFL, including other anti-VEGF agents in the fellow eye</li> <li>○ Any other retinal disease that may interfere with the treatment of nAMD</li> </ul> |

IVT-AFL intravitreal aflibercept, nAMD neovascular age-related macular degeneration, VEGF vascular endothelial growth factor



**Online Supplementary Table S3** Mean change in BCVA from baseline to month 12 and month 24

|                 | <b>EMA-aligned<br/>label<br/><i>n</i> = 1165</b> | <b>Non-EMA-aligned<br/>label<br/><i>n</i> = 301</b> | <b>Total<br/><i>N</i> = 1466</b> |
|-----------------|--------------------------------------------------|-----------------------------------------------------|----------------------------------|
| <b>Baseline</b> |                                                  |                                                     |                                  |
| Mean VA         | 55.1 ± 19.8                                      | 51.6 ± 21.8                                         | 54.3 ± 20.3                      |
| <i>n</i> (%)    | 1165 (100)                                       | 301 (100)                                           | 1466 (100)                       |
| <b>Month 12</b> |                                                  |                                                     |                                  |
| Mean VA         | 59.7 ± 21.5                                      | 54.9 ± 24.9                                         | 58.7 ± 22.3                      |
| Change from BL  | 4.6 [3.6, 5.6]                                   | 3.4 [1.5, 5.2]                                      | 4.3 [3.4, 5.3]                   |
| <i>n</i> (%)    | 1150 (98.7)                                      | 301 (100)                                           | 1451 (99.0)                      |
| <b>Month 24</b> |                                                  |                                                     |                                  |
| Mean VA         | 57.4 ± 23.2                                      | 53.8 ± 26.5                                         | 56.6 ± 24.0                      |
| Change from BL  | 2.3 [1.2, 3.4]                                   | 2.2 [0.1, 4.3]                                      | 2.3 [1.3, 3.3]                   |
| <i>n</i> (%)    | 1165 (100)                                       | 301 (100)                                           | 1466 (100)                       |

FAS, LOCF. Data are mean ± SD and mean [95% CI], unless otherwise stated

BCVA best-corrected visual acuity, BL baseline, CI confidence interval, EMA European Medicines Agency, FAS full analysis set, LOCF last observation carried forward, SD standard deviation, VA visual acuity

**Online Supplementary Table S4** The proportion of patients (as defined by treatment eyes) achieving a VA letter score  $\geq 70$  letters (Snellen equivalent of 20/40 or better) in patients with treatment-naïve nAMD following 12 and 24 months of IVT-AFL treatment in routine clinical practice

|                   | <b>EMA-aligned<br/>label<br/><i>n</i> = 1165</b> | <b>Non-EMA-aligned<br/>label<br/><i>n</i> = 301</b> | <b>Total<br/><i>N</i> = 1466</b> |
|-------------------|--------------------------------------------------|-----------------------------------------------------|----------------------------------|
| <b>Baseline</b>   |                                                  |                                                     |                                  |
| $\geq 70$ letters | 334 (28.7)                                       | 78 (25.9)                                           | 412 (28.1)                       |
| $< 70$ letters    | 831 (71.3)                                       | 223 (74.1)                                          | 1054 (71.9)                      |
| <b>12 months</b>  |                                                  |                                                     |                                  |
| $\geq 70$ letters | 514 (44.1)                                       | 123 (40.9)                                          | 637 (43.5)                       |
| $< 70$ letters    | 636 (54.6)                                       | 178 (59.1)                                          | 814 (55.5)                       |
| <b>24 months</b>  |                                                  |                                                     |                                  |
| $\geq 70$ letters | 486 (41.7)                                       | 123 (40.9)                                          | 609 (41.5)                       |
| $< 70$ letters    | 679 (58.3)                                       | 178 (59.1)                                          | 857 (58.5)                       |

Data are *n* (%)

FAS, LOCF

EMA European Medicines Agency, FAS full analysis set, IVT-AFL intravitreal aflibercept, LOCF last observation carried forward, nAMD neovascular age-related macular degeneration, VA visual acuity

**Online Supplementary Table S5** Mean change in CST measured by OCT ( $\mu\text{m}$ ) from BL to month 12 and month 24 in patients with treatment-naïve nAMD

|                 | <b>EMA-aligned<br/>label<br/><i>n</i> = 894</b> | <b>Non-EMA-aligned<br/>label<br/><i>n</i> = 273</b> | <b>Total<br/><i>N</i> = 1167</b> |
|-----------------|-------------------------------------------------|-----------------------------------------------------|----------------------------------|
| <b>Baseline</b> |                                                 |                                                     |                                  |
| Mean CST        | 378 $\pm$ 131                                   | 362 $\pm$ 107                                       | 374 $\pm$ 126                    |
| <i>n</i> (%)    | 894 (100)                                       | 273 (100)                                           | 1167 (100)                       |
| <b>Month 12</b> |                                                 |                                                     |                                  |
| Mean CST        | 271 $\pm$ 97                                    | 260 $\pm$ 82                                        | 269 $\pm$ 93                     |
| Change from BL  | -107 [-116, -98]                                | -103 [-118, -86]                                    | -106 [-114, -99]                 |
| <i>n</i> (%)    | 837 (93.6)                                      | 268 (98.2)                                          | 1105 (94.7)                      |
| <b>Month 24</b> |                                                 |                                                     |                                  |
| Mean CST        | 267 $\pm$ 96                                    | 254 $\pm$ 71                                        | 264 $\pm$ 91                     |
| Change from BL  | -109 [-118, -100]                               | -109 [-123, -96]                                    | -109 [-117, -102]                |
| <i>n</i> (%)    | 860 (96.2)                                      | 268 (98.2)                                          | 1128 (96.7)                      |

FAS, LOCF. Data are mean  $\pm$  SD and mean [95% CI], unless otherwise stated. The mean CST change data are based on the nearest CST assessment within the  $\pm$  60-day visit window of 360 days for month 12 and 720 days for month 24

*BL* baseline, *CI* confidence interval, *CST* central subfield thickness, *EMA* European Medicines Agency, *FAS* full analysis set, *LOCF* last observation carried forward, *nAMD* neovascular age-related macular degeneration, *OCT* optical coherence tomography, *SD* standard deviation

**Online Supplementary Table S6** Safety overview cumulative up to 2 years (SAS)

| Number of patients (%)                                                    | EMA-aligned label<br><i>n</i> = 1221 | Non-EMA-aligned label<br><i>n</i> = 329 | Total<br><i>N</i> = 1550 |
|---------------------------------------------------------------------------|--------------------------------------|-----------------------------------------|--------------------------|
| <b>Any AE</b>                                                             | 88 (7.2)                             | 13 (4.0)                                | 101 (6.5)                |
| <b>Any TEAE</b>                                                           | 384 (31.4)                           | 80 (24.3)                               | 464 (29.9)               |
| Any ocular TEAE                                                           | 271 (22.2)                           | 54 (16.4)                               | 325 (21.0)               |
| Any non-ocular TEAE                                                       | 178 (14.6)                           | 38 (11.6)                               | 216 (13.9)               |
| Any ocular TEAE in the study eye                                          | 197 (16.1)                           | 36 (10.9)                               | 233 (15.0)               |
| Any ocular TEAE in the fellow eye                                         | 138 (11.3)                           | 26 (7.9)                                | 164 (10.6)               |
| <b>Most common ocular TEAEs in the study eye (≥ 1%)</b>                   |                                      |                                         |                          |
| Cataract                                                                  | 38 (3.1)                             | 5 (1.5)                                 | 43 (2.8)                 |
| Blepharitis                                                               | 18 (1.5)                             | 1 (0.3)                                 | 19 (1.2)                 |
| <b>Any SAE</b>                                                            | 50 (4.1)                             | 10 (3.0)                                | 60 (3.9)                 |
| <b>Any serious TEAEs</b>                                                  | 133 (10.9)                           | 23 (7.0)                                | 156 (10.1)               |
| Any serious drug-related TEAE                                             | 12 (1.0)                             | 1 (0.3)                                 | 13 (0.8)                 |
| Any serious drug-related ocular TEAE                                      | 8 (0.7)                              | 0 (0)                                   | 8 (0.5)                  |
| Any serious drug-related non-ocular TEAE                                  | 4 (0.3)                              | 1 (0.3)                                 | 5 (0.3)                  |
| Any serious TEAE causally related to IVT injection procedure <sup>a</sup> | 1 (0.1)                              | 0 (0)                                   | 1 (0.1)                  |
| <b>Withdrawal of IVT-AFL</b>                                              |                                      |                                         |                          |
| Ocular TEAE                                                               | 12 (4.4)                             | 1 (1.9)                                 | 13 (4.0)                 |
| Drug-related ocular TEAE                                                  | 7 (11.9)                             | 1 (5.3)                                 | 8 (10.3)                 |
| Serious ocular TEAE                                                       | 5 (12.8)                             | 0 (0)                                   | 5 (12.2)                 |
| Serious drug-related ocular TEAE                                          | 2 (25.0)                             | 0 (0)                                   | 2 (25.0)                 |
| Non-ocular TEAE                                                           | 3 (1.7)                              | 0 (0)                                   | 3 (1.4)                  |
| Drug-related non-ocular TEAE                                              | 1 (12.5)                             | 0 (0)                                   | 1 (11.1)                 |
| Serious non-ocular TEAE                                                   | 3 (3.1)                              | 0 (0)                                   | 3 (2.5)                  |
| Serious drug-related non-ocular TEAE                                      | 1 (25.0)                             | 0 (0)                                   | 1 (20.0)                 |

<sup>a</sup>Injection site inflammation

AE adverse event, EMA European Medicines Agency, IVT-AFL intravitreal aflibercept, IVT intravitreal, nAMD neovascular age-related macular degeneration, SAE serious adverse event, SAS safety analysis set, TEAE, treatment-emergent adverse event
